# Supplementary material for: Immunomodulatory dynamics in the porcine myometrium: global transcriptome analysis, including the effects of PPARγ ligands
Source: Research Square preprint supplement (doi:10.21203/rs.3.rs-5036285/v1), 2024-10-16
Supplement: Supplementary file 3 [file dbd687ccca2697414df6c925.xlsx]

## Sheet: Arkusz1
Gene name	Forward	Reverse	Product Lenght	Accesion number
ACTB	ACATCAAGGAGAAGCTCTGCTACG	GAGGGGCGATCTTGATCTTCA	363	XM_021086047.1
GAPDH	ACATCATCCCTGCTTCTACCG	CCAGTGAGCTTCCCGTTGAG	76	NM_001206359.1
NR4A3	AATGCCCTTGTCCGAGCTTT	CGTCAATGGAGGCTGTGAGA	142	NM_214247.1
TNFAIP3	GTGAC CCTGAAGGACAGTG G	CGAATCTTC CTCGCTCTCTGT	70	NM_001267890.1
CCL5	ACACCACACCCTGCTGTTTT	TCTTCTCTGGGTTGGCACAC	150	NM_001129946.2
KDR	TGGTCAATCTTCTGGGTGCC	ACCGTGCCCCTTTAGTCTTG	141	XM_013997943.2
IL6	TCTGGGTTCAATCAGGAGACC	ACTAATCTGCACAGCCTCGAC	129	NM_214399.1
IDO1	CGGCTGCTTCTGCAATCAAG	TGCAAAGCATCCAGGTCTTCA	73	NM_001246240.1
